# Supplementary material
Source: HighWire-hosted journal article supplement (http://thorax.bmjjournals.com/highwire/filestream/173891/field_highwire_adjunct_files/3/628684webonlyapp4.pdf)

Figure E1

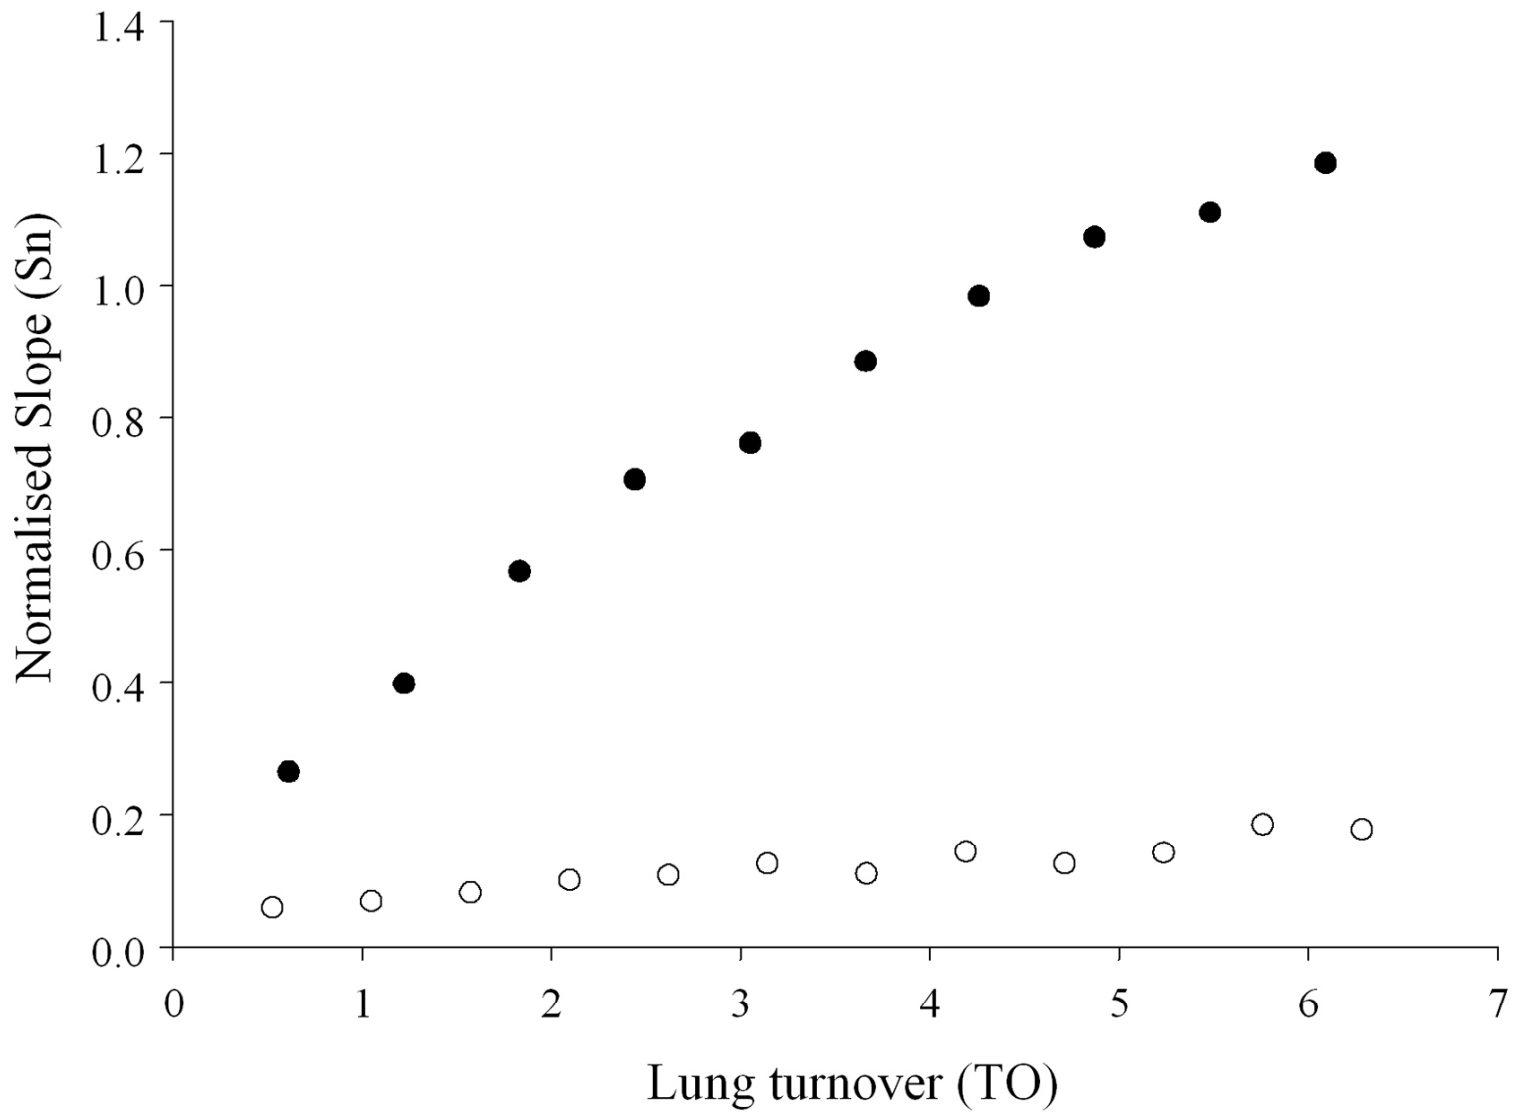

Supplement: 628684webonlyapp4.pdf [file 628684webonlyapp4.pdf]
